# Supplementary material
Source: Springer Nature journal article supplement (https://www.springermedizin.de/resource/supplementary/13014_2011_461_MOESM4_ESM.pdf/9633442)

**CRL 11372**

surviving fraction

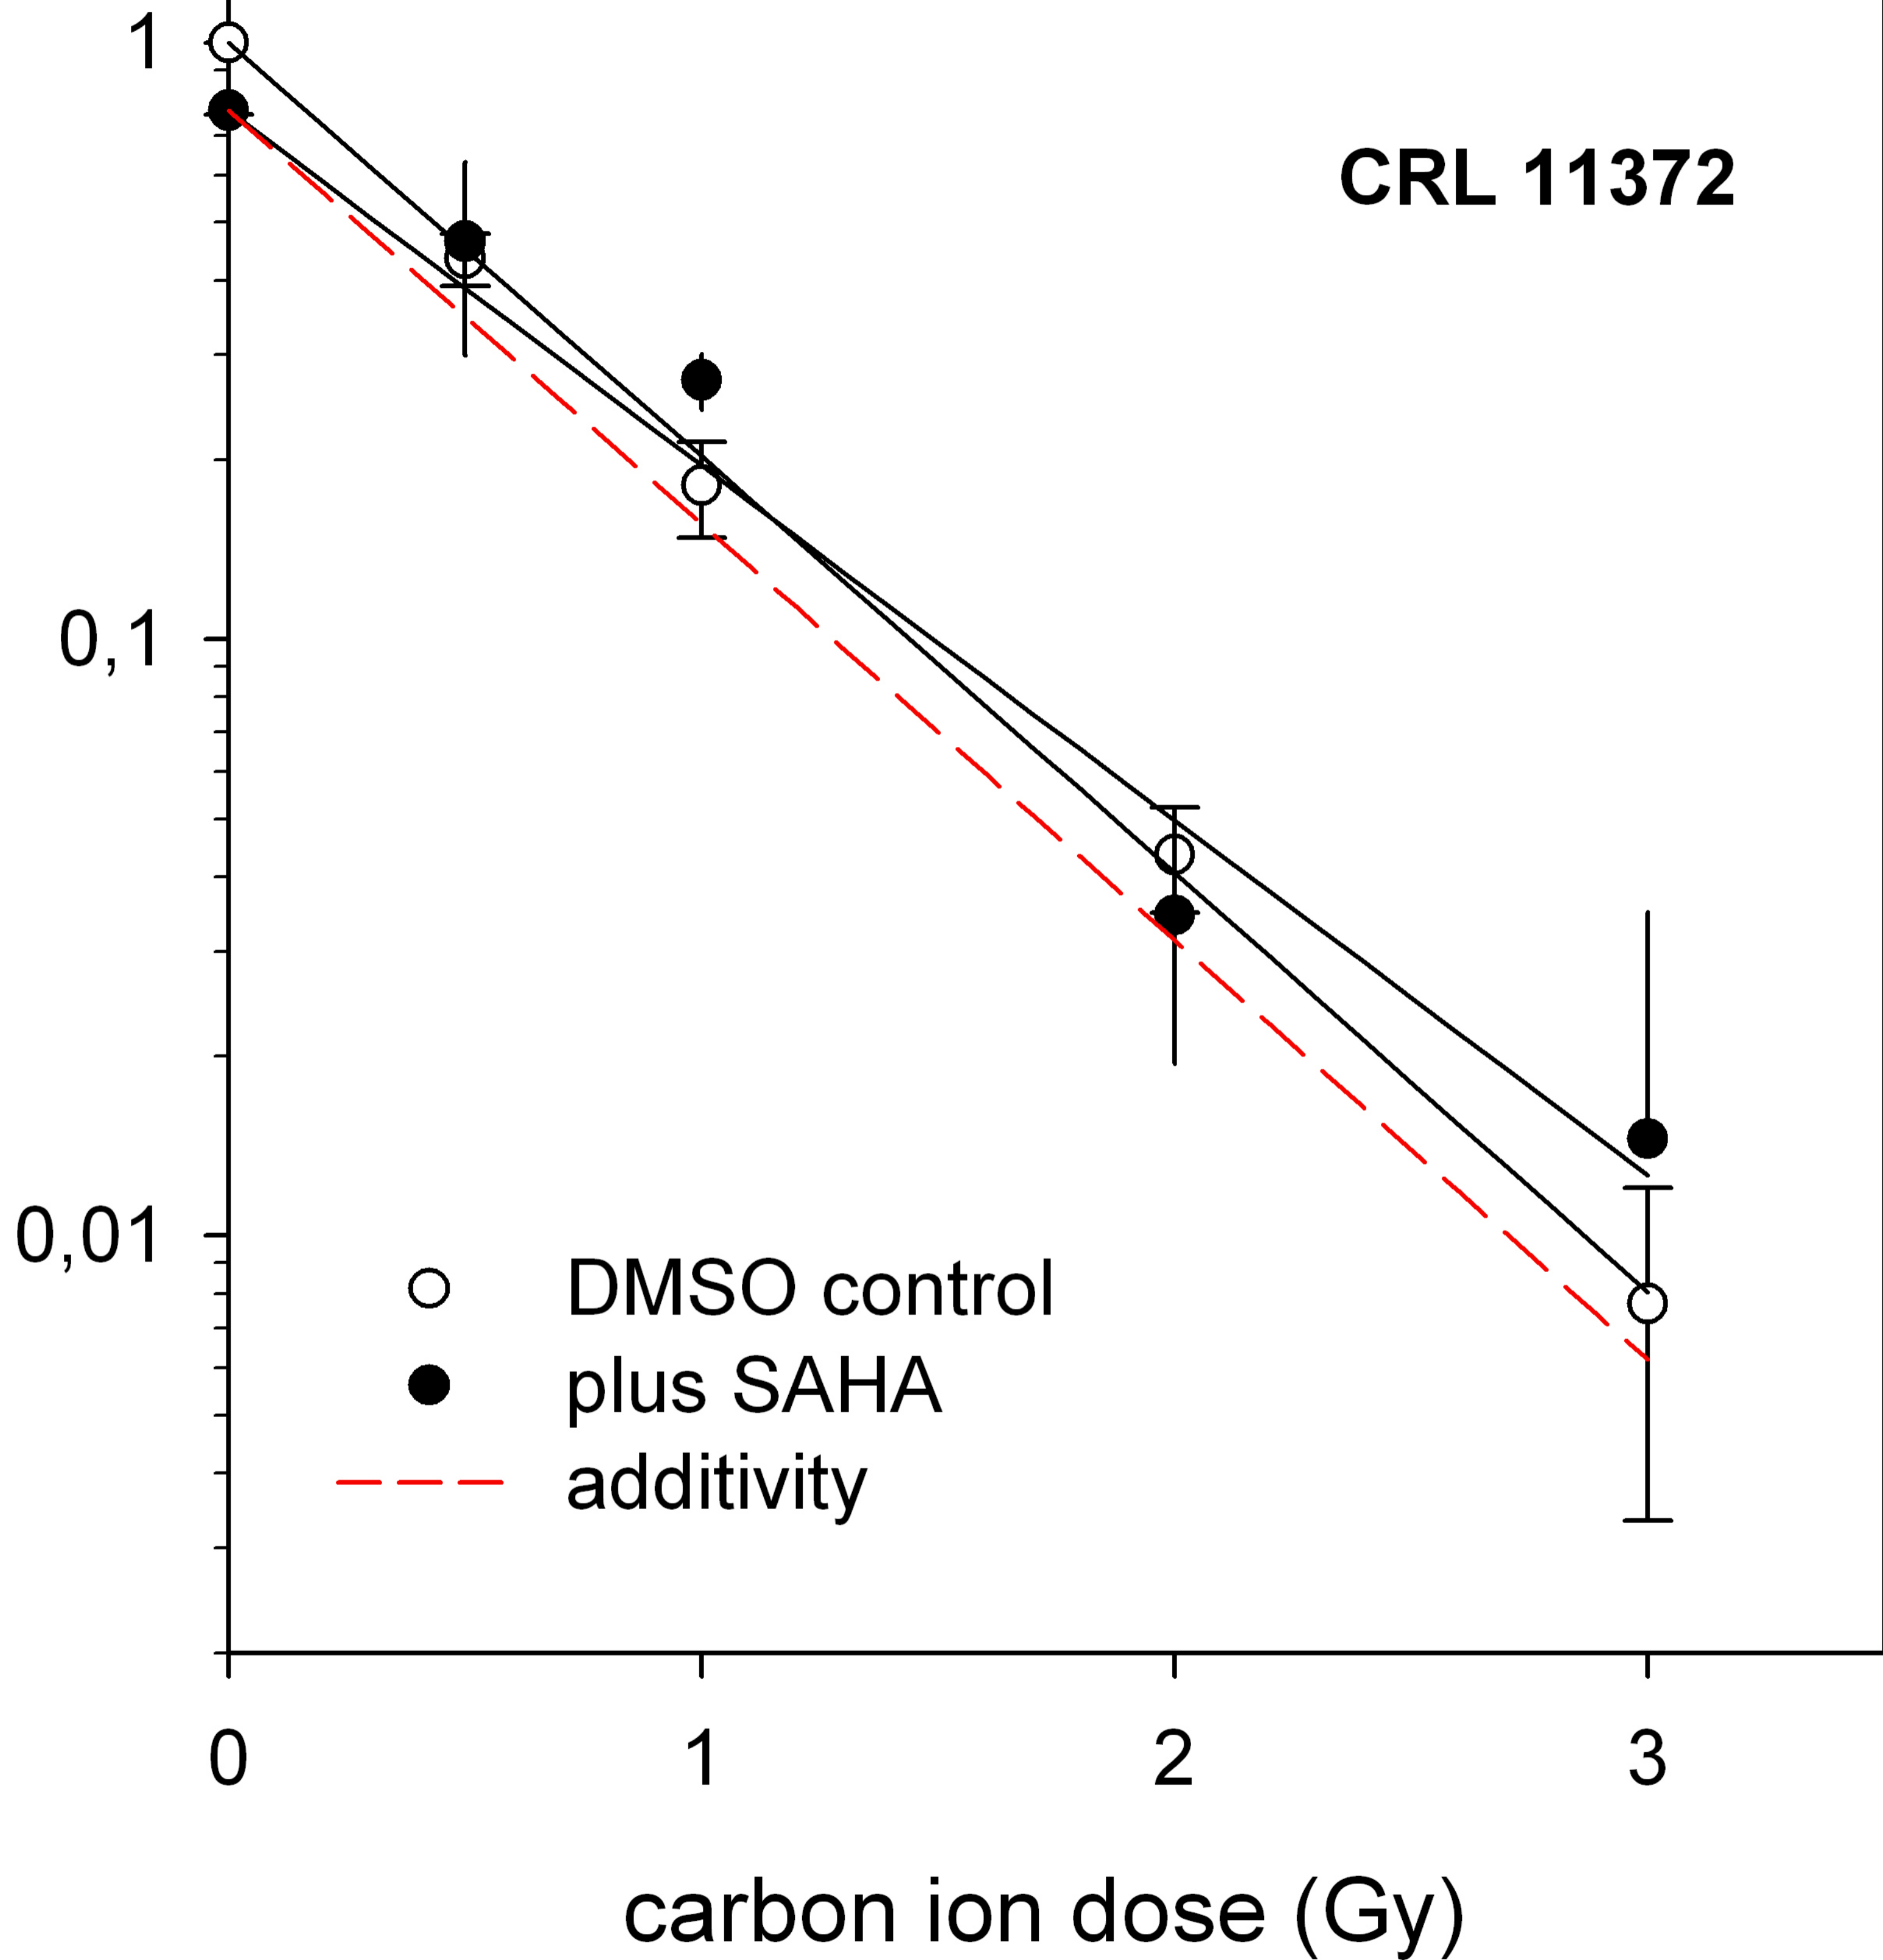

- DMSO control
- plus SAHA
- - - additivity

Supplement: MOESM4 [file 9633442]
